# Supplementary material for: Early pancreatic islet fate and maturation is controlled through RBP-Jκ
Source: PubMed Central journal article supplement (PMC4886527; doi:10.1038/srep26874), 2016-05-31

# Early pancreatic islet fate and maturation is controlled through RBP-Jk

Corentin Cras-Méneur, Megan Conlon, Yaqing Zhang, Marina Pasca Di Magliano, Ernesto Bernal-Mizrachi

Supplemental Figure 1

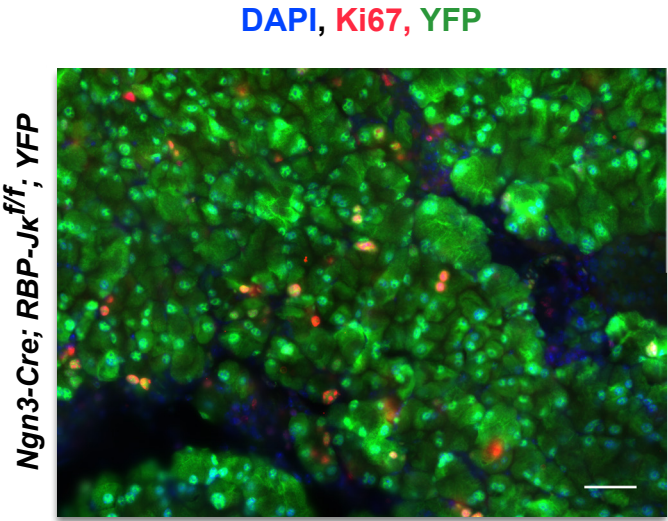

# Early pancreatic islet fate and maturation is controlled through RBP-Jk

Corentin Cras-Méneur, Megan Conlon, Yaqing Zhang, Marina Pasca Di Magliano, Ernesto Bernal-Mizrachi

Supplemental Figure 2

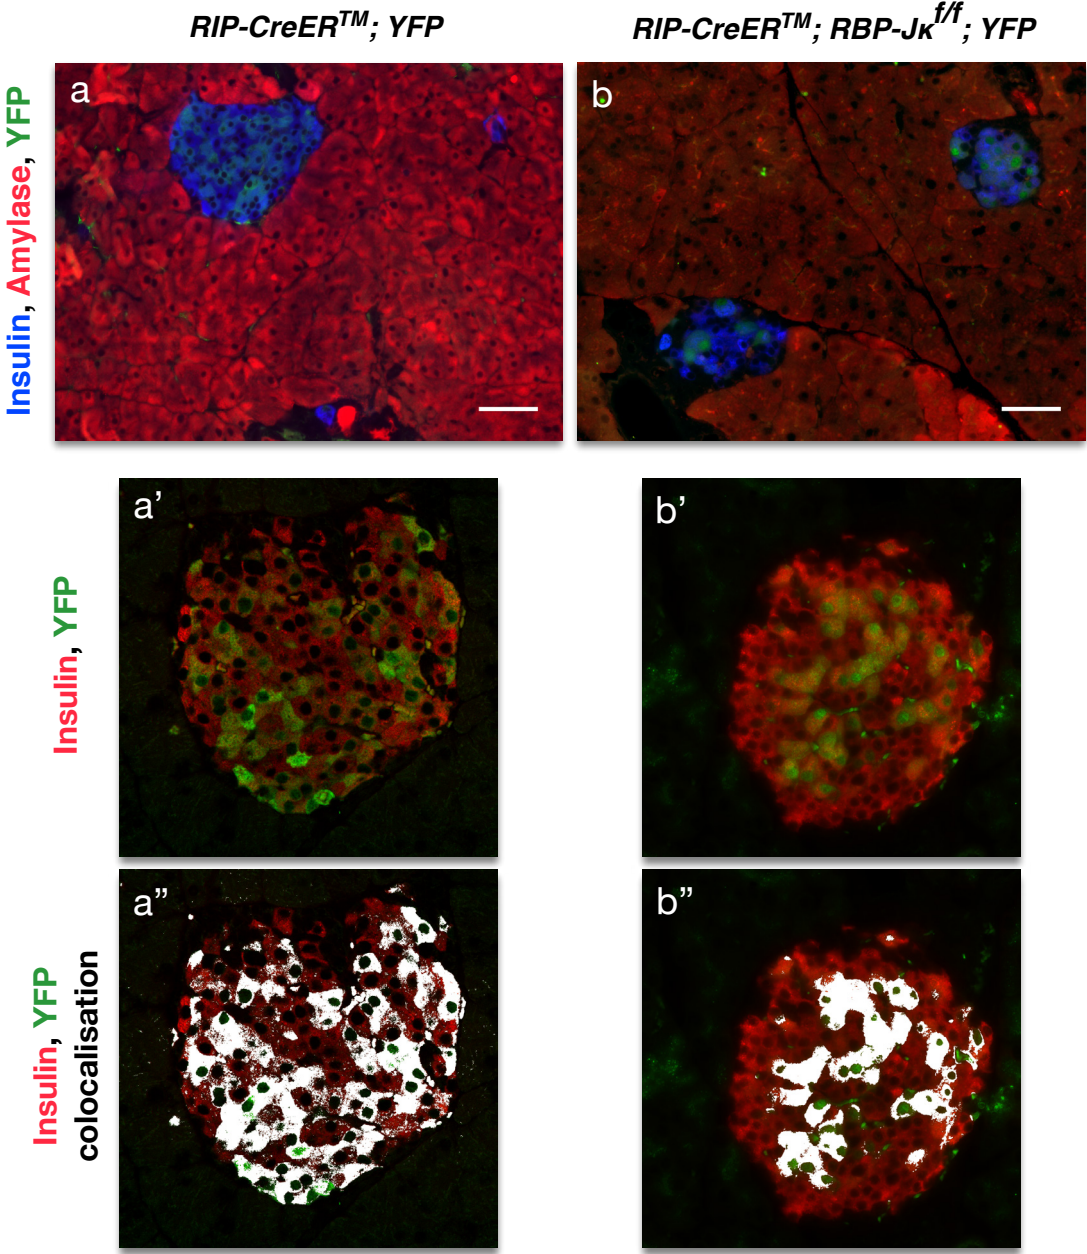

Supplement: srep26874-s1.pdf [file srep26874-s1.pdf]
